# Supplementary material for: Climate change jeopardizes the persistence of freshwater zooplankton by reducing both habitat suitability and demographic resilience
Source: PubMed Central journal article supplement (PMC5782365; doi:10.1186/s12898-018-0158-z), 2018-01-24
Supplement: 12898_2018_158_MOESM1_ESM.pdf [file 12898_2018_158_MOESM1_ESM.pdf]

## Additional file 1: Study system and model species

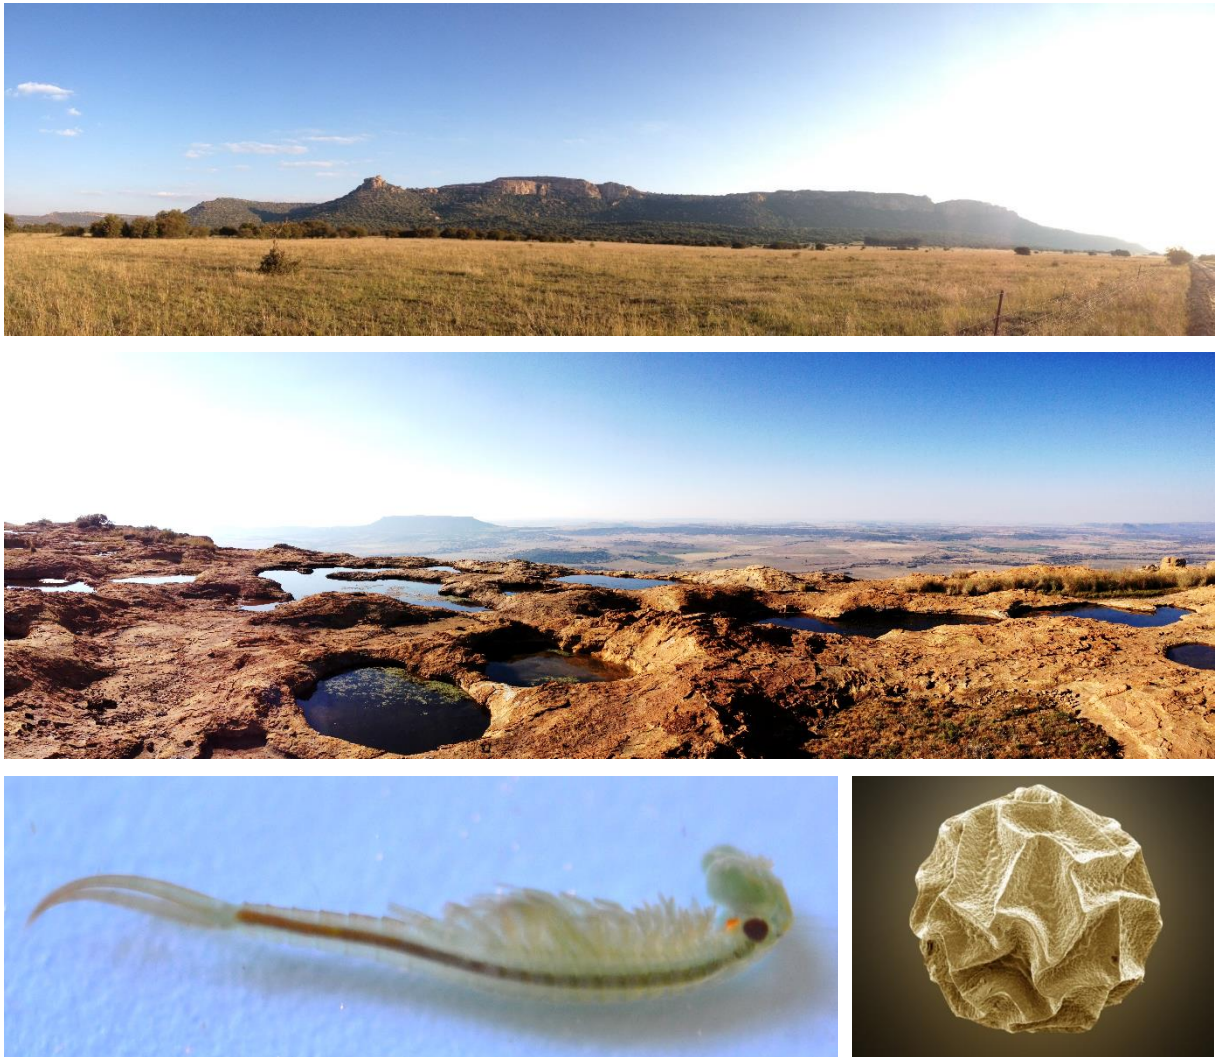

**Additional Figure 1** Korannaberg mountain is a sandstone inselberg (top picture) in the Eastern Free State province in South Africa. On top of the inselberg, a number of basins have eroded that can temporarily hold water after rainfall until they dry-out due to evaporation (middle picture). Despite their temporary nature, these aquatic ecosystems are inhabited by a number of zooplankton species among which the fairy shrimp *Branchipodopsis wolfi* is most prevalent (bottom picture left, animal size:  $\pm 2\text{cm}$ ). Like many zooplankton species *B. wolfi* females produce drought resistant dormant eggs to bridge dry phases of their habitat (bottom picture right, egg size:  $\pm 200\mu\text{m}$ ).
