# Supplementary material for: Climate change jeopardizes the persistence of freshwater zooplankton by reducing both habitat suitability and demographic resilience
Source: PubMed Central journal article supplement (PMC5782365; doi:10.1186/s12898-018-0158-z), 2018-01-24
Supplement: 12898_2018_158_MOESM2_ESM.pdf [file 12898_2018_158_MOESM2_ESM.pdf]

## Additional file 2: Daily temperature cycles

**Additional Table 1** Daily temperature cycles as experienced by *Branchipodopsis wolffi* eggs in dry, sun-exposed rock pool sediment under present-day (Pres) and predicted future climate (Fut) conditions for the eight months of the incubation experiment. A conversion factor (C) was calculated to convert temperatures, as measured at the weather station, to temperatures in sun-exposed sediment.

|      |     | October |      | November |      | December |      | January |      | February |      | March |      | April |      | May  |      |
|------|-----|---------|------|----------|------|----------|------|---------|------|----------|------|-------|------|-------|------|------|------|
| T(h) | C   | Pres    | Fut  | Pres     | Fut  | Pres     | Fut  | Pres    | Fut  | Pres     | Fut  | Pres  | Fut  | Pres  | Fut  | Pres | Fut  |
| 0    | 1.0 | 14.2    | 18.2 | 16.3     | 20.3 | 18.1     | 22.1 | 20.4    | 24.4 | 19.1     | 23.1 | 17.0  | 21.0 | 11.1  | 15.1 | 12.4 | 8.4  |
| 1    | 1.0 | 13.4    | 17.4 | 15.7     | 19.7 | 17.4     | 21.4 | 19.7    | 23.7 | 18.6     | 22.6 | 16.4  | 20.4 | 10.6  | 14.6 | 11.8 | 7.8  |
| 2    | 1.0 | 13.0    | 17.0 | 15.0     | 19.0 | 16.9     | 20.9 | 19.3    | 23.3 | 18.2     | 22.2 | 15.8  | 19.8 | 10.1  | 14.1 | 11.3 | 7.3  |
| 3    | 1.0 | 12.4    | 16.4 | 14.5     | 18.5 | 16.4     | 20.4 | 18.6    | 22.6 | 17.8     | 21.8 | 15.2  | 19.2 | 9.6   | 13.6 | 10.9 | 6.9  |
| 4    | 1.0 | 11.9    | 15.9 | 13.9     | 17.9 | 15.9     | 19.9 | 18.1    | 22.1 | 17.4     | 21.4 | 14.9  | 18.9 | 9.0   | 13.0 | 10.2 | 6.2  |
| 5    | 1.0 | 11.1    | 15.1 | 13.5     | 17.5 | 15.5     | 19.5 | 17.6    | 21.6 | 16.9     | 20.9 | 14.6  | 18.6 | 9.0   | 13.0 | 10.2 | 6.2  |
| 6    | 1.2 | 12.3    | 16.3 | 16.4     | 21.0 | 18.9     | 23.5 | 20.1    | 24.7 | 19.1     | 23.7 | 16.4  | 21.0 | 9.9   | 14.5 | 11.4 | 6.8  |
| 7    | 1.2 | 16.3    | 20.9 | 19.5     | 24.1 | 21.0     | 25.6 | 22.8    | 27.4 | 21.2     | 25.8 | 17.0  | 21.6 | 9.9   | 14.5 | 11.1 | 6.5  |
| 8    | 1.2 | 20.1    | 24.9 | 22.8     | 27.6 | 24.0     | 28.8 | 26.2    | 31.0 | 24.3     | 29.1 | 21.0  | 25.8 | 15.2  | 20.0 | 15.8 | 11.0 |
| 9    | 1.4 | 26.0    | 31.4 | 28.3     | 33.7 | 29.4     | 34.8 | 32.4    | 37.8 | 30.0     | 35.4 | 26.2  | 31.6 | 20.6  | 26.0 | 22.8 | 17.4 |
| 10   | 1.4 | 29.7    | 35.3 | 31.3     | 36.8 | 32.2     | 37.7 | 35.8    | 41.3 | 33.1     | 38.6 | 29.6  | 35.1 | 24.3  | 29.8 | 27.0 | 21.5 |
| 11   | 1.4 | 32.5    | 38.1 | 33.8     | 39.4 | 34.6     | 40.2 | 38.7    | 44.3 | 36.0     | 41.6 | 32.4  | 38.0 | 27.4  | 33.0 | 30.3 | 24.7 |
| 12   | 1.4 | 34.8    | 40.5 | 36.1     | 41.8 | 36.6     | 42.3 | 41.1    | 46.8 | 38.3     | 44.0 | 34.5  | 40.2 | 29.6  | 35.2 | 32.8 | 27.1 |
| 13   | 1.4 | 35.2    | 40.7 | 36.1     | 41.6 | 36.7     | 42.3 | 41.3    | 46.8 | 38.3     | 43.8 | 34.9  | 40.4 | 30.1  | 35.6 | 33.2 | 27.7 |
| 14   | 1.2 | 31.5    | 36.3 | 31.9     | 36.7 | 32.5     | 37.3 | 36.6    | 41.4 | 34.0     | 38.8 | 31.1  | 35.9 | 26.7  | 31.5 | 29.7 | 24.9 |
| 15   | 1.0 | 27.5    | 31.6 | 27.6     | 31.8 | 28.3     | 32.5 | 32.0    | 36.1 | 29.7     | 33.8 | 27.1  | 31.3 | 23.4  | 27.6 | 26.0 | 21.8 |
| 16   | 1.0 | 21.8    | 25.1 | 22.0     | 25.3 | 27.2     | 31.2 | 30.5    | 34.5 | 28.3     | 32.3 | 26.0  | 30.0 | 22.3  | 26.3 | 24.9 | 20.9 |
| 17   | 1.0 | 21.9    | 25.3 | 22.0     | 25.3 | 26.5     | 30.5 | 29.6    | 33.6 | 27.8     | 31.8 | 25.4  | 29.4 | 22.0  | 26.0 | 24.0 | 20.0 |
| 18   | 1.0 | 21.5    | 25.0 | 22.0     | 25.3 | 25.6     | 29.6 | 28.8    | 32.8 | 27.1     | 31.1 | 24.3  | 28.3 | 19.4  | 23.4 | 19.6 | 15.6 |
| 19   | 1.0 | 19.5    | 23.2 | 21.2     | 24.9 | 23.6     | 27.6 | 26.9    | 30.9 | 25.0     | 29.0 | 21.2  | 25.2 | 16.1  | 20.1 | 16.7 | 12.7 |
| 20   | 1.0 | 17.8    | 21.7 | 19.5     | 23.3 | 21.3     | 25.3 | 24.5    | 28.5 | 22.6     | 26.6 | 19.5  | 23.5 | 14.1  | 18.1 | 15.4 | 11.4 |
| 21   | 1.0 | 17.1    | 21.1 | 18.9     | 22.9 | 20.0     | 24.0 | 23.2    | 27.2 | 21.0     | 25.0 | 18.6  | 22.6 | 12.8  | 16.8 | 14.7 | 10.7 |
| 22   | 1.0 | 16.0    | 20.0 | 17.9     | 21.9 | 19.3     | 23.3 | 22.0    | 26.0 | 20.4     | 24.4 | 17.8  | 21.8 | 12.0  | 16.0 | 13.9 | 9.9  |
| 23   | 1.0 | 15.0    | 19.0 | 17.2     | 21.2 | 18.7     | 22.7 | 20.9    | 24.9 | 19.6     | 23.6 | 17.4  | 21.4 | 11.4  | 15.4 | 13.3 | 9.3  |
